# Supplementary material for: Creating a two-dimensional hole gas in a polar/polar LaAlO3/KTaO3 perovskite heterostructure
Source: Royal Society of Chemistry journal article supplement (doi:10.1039/d0tc03439h), 2020-01-01
Supplement: d0tc03439h1.pdf [file d0tc03439h1.pdf]

## Supporting Information

### Creating Two-Dimensional Hole Gas in Polar/Polar LaAlO<sub>3</sub>/KTaO<sub>3</sub> Perovskite Heterostructure

Yaqin Wang,<sup>1,2,3</sup> Zhengtao Zhang,<sup>1</sup> Jianli Cheng,<sup>3</sup> Qinyong Zhang,<sup>1</sup> Wu Tang<sup>2</sup> and Kesong Yang<sup>3,\*</sup>

<sup>1</sup>*Key Laboratory of Fluid and Power Machinery, School of Material Science and Engineering, Xihua University, Chengdu, 610039, People's Republic of China*

<sup>2</sup>*State Key Laboratory of Electronic Thin Films and Integrated Devices, University of Electronic Science and Technology of China, Chengdu 610054, People's Republic of China*

<sup>3</sup>*Department of NanoEngineering, University of California San Diego, 9500 Gilman Drive, La Jolla, California, 92093-0448, United States*

\*E-mail: [kesong@ucsd.edu](mailto:kesong@ucsd.edu). Phone: +1-858-534-2514.

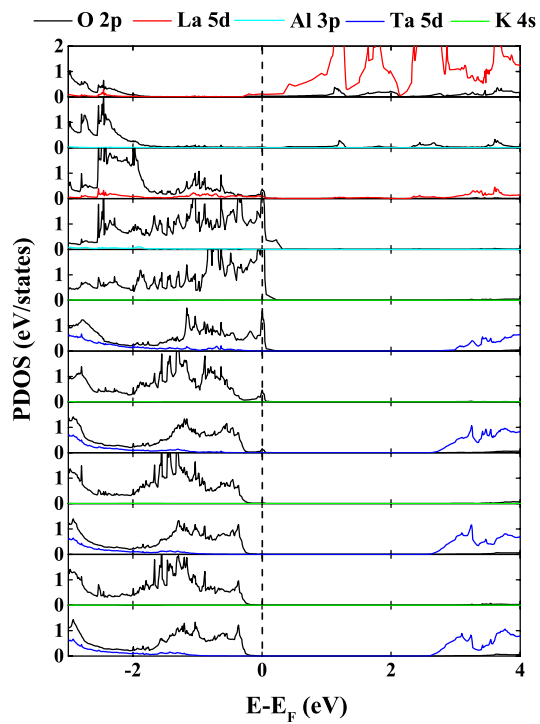

**Figure S1:** Calculated layer-resolved partial density of states (DOS) for the unrelaxed  $(\text{LaAlO}_3)_2/\text{KTaO}_3$  HS system. The Fermi level is indicated by the vertical dashed line at zero in this and subsequent DOS figure.

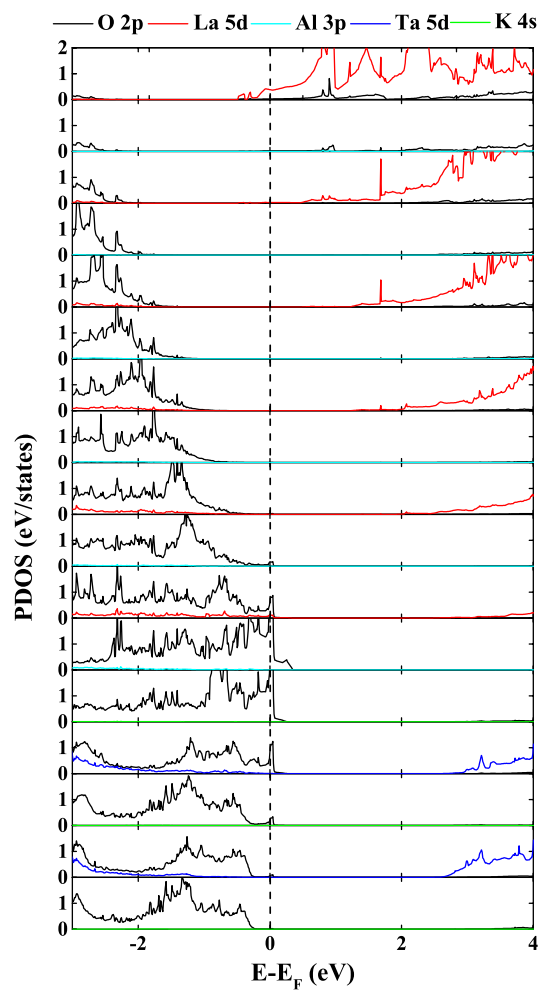

**Figure S2:** Calculated layer-resolved partial DOS for the unrelaxed  $(\text{LaAlO}_3)_6/\text{KTaO}_3$  HS system.
